# Supplementary material
Source: HighWire-hosted journal article supplement (https://bmjopengastro.bmj.com/highwire/filestream/3507/field_highwire_adjunct_files/1/bmjgast-2023-001115supp002_data_supplement.pdf)

**A**

### Partial R<sup>2</sup> Values of HRQoL Associations with Clinical Endpoints

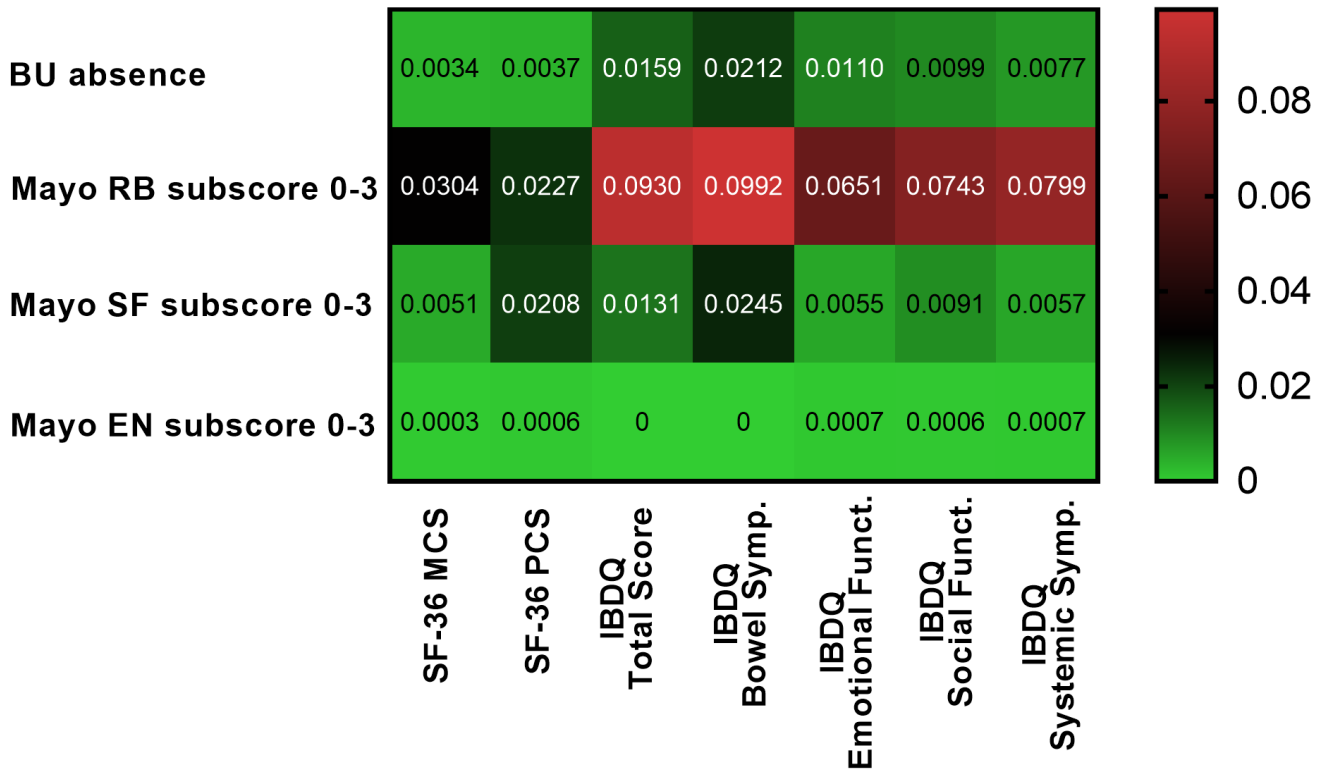

**B**

### P Values of HRQoL Associations with Clinical Endpoints

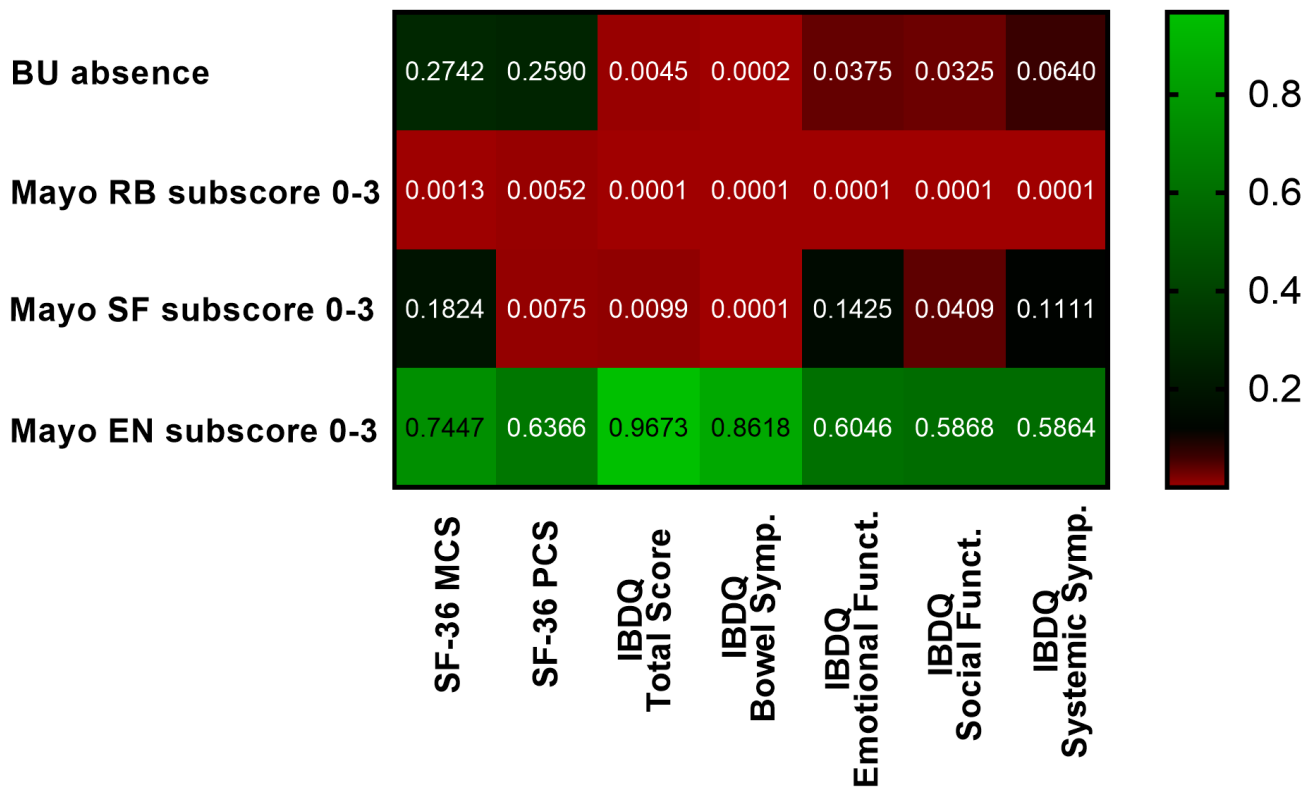

Supplement: bmjgast-2023-001115supp002_data_supplement.pdf [file bmjgast-2023-001115supp002_data_supplement.pdf]
